# Supplementary material
Source: Springer Nature journal article supplement (https://www.springermedizin.de/resource/supplementary/13075_2006_2011_MOESM1_ESM.pdf/9691102)

Supplemental file 1

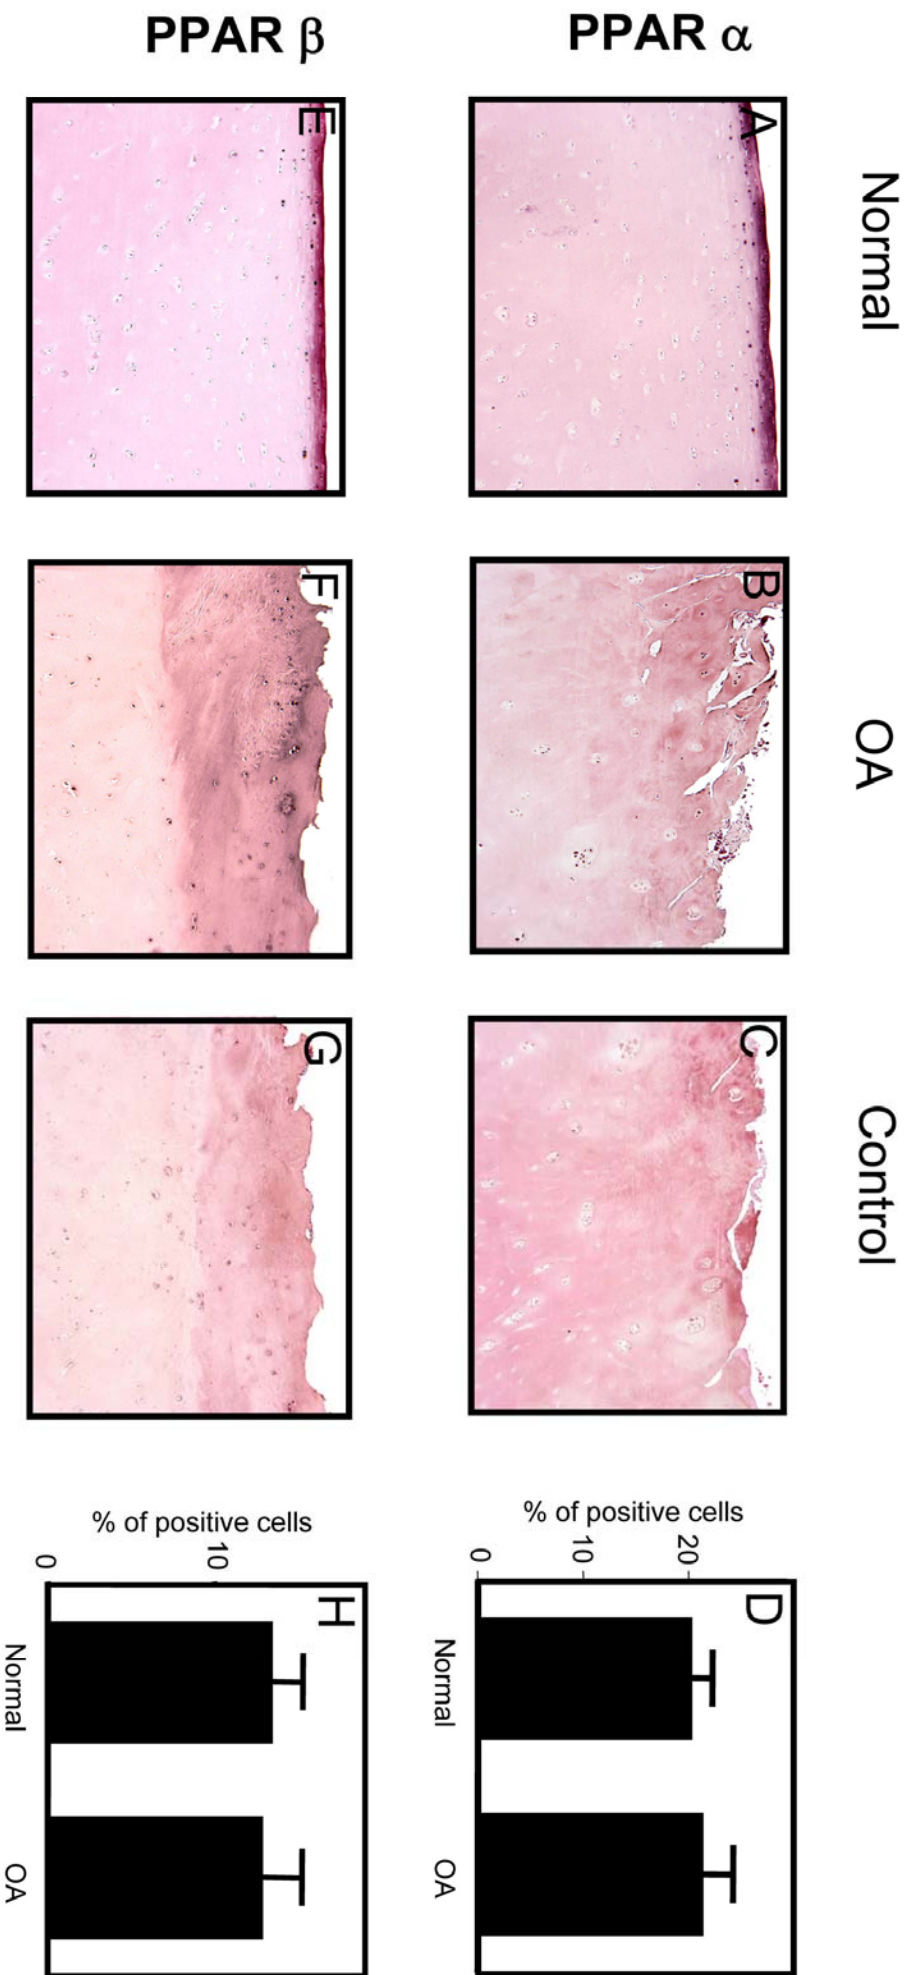

Supplement: MOESM1 [file 9691102]
